# Supplementary material for: The evolution of lung cancer and impact of subclonal selection in TRACERx
Source: PubMed Central journal article supplement (PMC10115649; doi:10.1038/s41586-023-05783-5), 2023-04-12
Supplement: 41586_2023_5783_MOESM2_ESM.pdf [file 41586_2023_5783_MOESM2_ESM.pdf]

## Reporting Summary

Nature Portfolio wishes to improve the reproducibility of the work that we publish. This form provides structure for consistency and transparency in reporting. For further information on Nature Portfolio policies, see our [Editorial Policies](#) and the [Editorial Policy Checklist](#).

### Statistics

For all statistical analyses, confirm that the following items are present in the figure legend, table legend, main text, or Methods section.

n/a Confirmed

- The exact sample size ( $n$ ) for each experimental group/condition, given as a discrete number and unit of measurement
- A statement on whether measurements were taken from distinct samples or whether the same sample was measured repeatedly
- The statistical test(s) used AND whether they are one- or two-sided  
*Only common tests should be described solely by name; describe more complex techniques in the Methods section.*
- A description of all covariates tested
- A description of any assumptions or corrections, such as tests of normality and adjustment for multiple comparisons
- A full description of the statistical parameters including central tendency (e.g. means) or other basic estimates (e.g. regression coefficient) AND variation (e.g. standard deviation) or associated estimates of uncertainty (e.g. confidence intervals)
- For null hypothesis testing, the test statistic (e.g.  $F$ ,  $t$ ,  $r$ ) with confidence intervals, effect sizes, degrees of freedom and  $P$  value noted  
*Give  $P$  values as exact values whenever suitable.*
- For Bayesian analysis, information on the choice of priors and Markov chain Monte Carlo settings
- For hierarchical and complex designs, identification of the appropriate level for tests and full reporting of outcomes
- Estimates of effect sizes (e.g. Cohen's  $d$ , Pearson's  $r$ ), indicating how they were calculated

*Our web collection on [statistics for biologists](#) contains articles on many of the points above.*

### Software and code

Policy information about [availability of computer code](#)

Data collection No software was used to collect data

Data analysis

R (version 3.6.3)  
Perl (version 5.24)  
Python (version 2.7.12 and 3.10.1)

Alignment and QC:  
FastQC (version 0.11.8)  
FastQ Screen (version 0.13.0)  
bwa-mem (version 0.7.17)  
Sambamba (version 0.7.0)  
Picard Tools (version 2.21.9)  
GATK (version 3.8.1)  
Somalier (version 0.2.7)  
Samtools (version 1.9)  
Conpair (version 0.2)

Variant Calling:  
SAMtools (version 1.10)  
VarScan2 (version 2.4.4)  
MuTect (version 1.1.7)  
bam-readcount (version 0.7.4)  
Annovar (version: Revision 529)

Heterozygous single nucleotide polymorphism (SNP) identification:  
Platypus (version 0.8.1)

Somatic Copy Number aberration detection:  
VarScan2 (version 2.4.4)  
ASCAT (version 2.3)  
Sequenza (version 2.1.2)

Mutation Clustering:  
Pyclone (version 0.13.1)  
SciClone (version 1.1.0)

R packages used in version 3.6.3:  
fst (version 0.9.4)  
tidyverse (version 1.3.0)  
survival (version 3.2.13)  
ggplot2 (version 3.3.2)  
dplyr (version 1.0.2)  
tidyr (version 1.1.2)  
gridExtra (version 2.3)  
cowplot (version 1.1.0)  
survminer (version 0.4.9)  
ggpubr (version 0.4.0)  
ggalluvial (version 0.12.3)  
gtsummary (version 1.5.0)  
reshape2 (version 1.4.4)  
tibble (version 3.0.4)  
gttable (version 0.3.0)  
RColorBrewer (version 1.1-2)  
plyr (version 1.8.6)  
dndscv (version 0.0.1.0)  
deconstructSigs (version 1.9.0)  
ggrepel (version 0.8.2)  
GenomicRanges (version 1.38.0)  
rlist (version 0.4.6.2)  
tidytext (version 0.2.3)  
stringr (version 1.4.0)  
magick (version 2.7.3)  
data.table (version 1.13.2)  
DiagrammR (version 1.0.1)  
magrittr (version 2.0.1)  
ComplexHeatmap (version 2.4.5)

Python packages for version 2.7.12:  
pandas (version 0.18.1)  
numpy (version 1.11.1)  
cPickle (version 1.72)

Python packages for version 3.10.1:  
pandas (version 1.3.5)  
numpy (version 1.22.0)  
matplotlib (version 3.5.1)  
scipy (version 1.7.3)  
graphviz (version 0.19.1)  
seaborn (version 0.11.2)  
sklearn (version 1.0.2)

All code to reproduce the figures will be available.

For manuscripts utilizing custom algorithms or software that are central to the research but not yet described in published literature, software must be made available to editors and reviewers. We strongly encourage code deposition in a community repository (e.g. GitHub). See the Nature Portfolio [guidelines for submitting code & software](#) for further information.

## Data

Policy information about [availability of data](#)

All manuscripts must include a [data availability statement](#). This statement should provide the following information, where applicable:

- Accession codes, unique identifiers, or web links for publicly available datasets
- A description of any restrictions on data availability
- For clinical datasets or third party data, please ensure that the statement adheres to our [policy](#)

The Whole Exome Sequencing data (from the TRACERx study) used during this study has been deposited at the European Genome-phenome Archive (EGA), which is hosted by The European Bioinformatics Institute (EBI) and the Centre for Genomic Regulation (CRG) under the accession codes EGAS00001006494; access is controlled by the TRACERx data access committee.

## Field-specific reporting

Please select the one below that is the best fit for your research. If you are not sure, read the appropriate sections before making your selection.

Life sciences  Behavioural & social sciences  Ecological, evolutionary & environmental sciences

For a reference copy of the document with all sections, see [nature.com/documents/nr-reporting-summary-flat.pdf](https://www.nature.com/documents/nr-reporting-summary-flat.pdf)

## Life sciences study design

All studies must disclose on these points even when the disclosure is negative.

Sample size

The sample size of 421 patients represents the half-way point of the TRACERx longitudinal study. In total 432 tumours (1644 tumour regions) of the 421 patients were analysed in this study.

TRACERx is a programme of work of multiple projects built around a single observational cohort study. It is not possible to perform a sample size calculation for each project, especially post hoc. The study size of the cohort was done in relation to tumour heterogeneity and disease free survival:

The sample size is based on demonstrating a relationship between tumours with divergent intratumour heterogeneity index values and clinical outcome. Patients will be split evenly into those with a low and high intratumour heterogeneity index value (and other splits will be considered). Assuming a median Disease Free Survival (DFS) of 30 months and a hazard ratio (HR) of 0.77, with a 2-sided 5% significance level, 90% power, accrual period of 3 years and 5 years follow-up after the end of accrual, the sample size required is almost 400 per group (total of 800 patients). Assuming a 5% dropout rate, a total of 842 patients (421 per group) are required. At 85% power, 705 patients would be required in total, which could be the minimum target. However, we will instead aim for 750 patients and recruitment will continue for the length of time which is funded for accrual in order to get as close as possible to the ideal target of 842 patients. A study size of 842 is also large enough to detect a 10% improvement in a 5 year OS rate from 46% in the high Intratumour Heterogeneity Index (ITB) to 56% in the low Intratumour Heterogeneity Index group (HR=0.75), with 80% power and a 2 sided type I error set at 5% (logrank test). A high/low ITB value will be defined as values above/below the 50th percentile (median ITB). We have a target DFS effect of a 23% reduction in risk (hazard ratio 0.77), which means that our study is powered for an effect at least this large, including a 30% difference (which has been the target for progression-free survival in trials of advanced NSCLC, in relation to expected effects on OS).

Data exclusions

Please see study inclusion/exclusion criteria below. Additionally, samples which fail quality control metrics including low tumor purity (<10%) were also excluded from analysis.

Replication

TRACERx is a prospective longitudinal study. As such, the results shown here are not the result of an experimental set up. This is the half-way point of the TRACERx study and reflects hypothesis generating analysis.

Randomization

Randomization is not relevant as this is an observational study.

Blinding

Blinding is not relevant as this is an observational study. Patients were not allocated to any intervention and they were followed up and assessed as per routine practice. No biomarker results (tissue and bloods) are reported back to patients, so there is no likelihood of people changing their behaviours based on these findings. The laboratory analyses were all performed without knowing the outcome (DFS or survival) status of the patients, which represents a form of blinding.

## Reporting for specific materials, systems and methods

We require information from authors about some types of materials, experimental systems and methods used in many studies. Here, indicate whether each material, system or method listed is relevant to your study. If you are not sure if a list item applies to your research, read the appropriate section before selecting a response.

### Materials & experimental systems

| n/a                                 | Involvement                                                     |
|-------------------------------------|-----------------------------------------------------------------|
| <input checked="" type="checkbox"/> | <input type="checkbox"/> Antibodies                             |
| <input checked="" type="checkbox"/> | <input type="checkbox"/> Eukaryotic cell lines                  |
| <input checked="" type="checkbox"/> | <input type="checkbox"/> Palaeontology and archaeology          |
| <input checked="" type="checkbox"/> | <input type="checkbox"/> Animals and other organisms            |
| <input type="checkbox"/>            | <input checked="" type="checkbox"/> Human research participants |
| <input type="checkbox"/>            | <input checked="" type="checkbox"/> Clinical data               |
| <input checked="" type="checkbox"/> | <input type="checkbox"/> Dual use research of concern           |

### Methods

| n/a                                 | Involvement                                     |
|-------------------------------------|-------------------------------------------------|
| <input checked="" type="checkbox"/> | <input type="checkbox"/> ChIP-seq               |
| <input checked="" type="checkbox"/> | <input type="checkbox"/> Flow cytometry         |
| <input checked="" type="checkbox"/> | <input type="checkbox"/> MRI-based neuroimaging |

## Human research participants

Policy information about [studies involving human research participants](#)

Population characteristics

421 patients are included in this TRACERx cohort. 44.6% are females, 55.4% males; 93% are smokers or have a smoking

## Population characteristics

history, 7% are never smokers; 25% of patients were diagnosed at stage IA, 25% at IB, 17.8% at IIA, 13.5% at IIB, 18.5% at IIIA and 0.2% at IIIB; 52% of diagnosed tumours were adenocarcinomas, 28.8% were squamous cell carcinomas and 19.2% were of other histological subtypes; 93% of the cohort is from a white ethnic background and the mean age of the patients is 69, ranging between 34 and 92.

Please note that the study started recruiting patients in 2016, when TNM version 7 was standard of care. The up-to-date inclusion/exclusion criteria now utilizes TNM version 8.

## TRACERx inclusion and exclusion criteria

## Inclusion Criteria:

- \_Written Informed consent
- \_Patients ≥18 years of age, with early stage I-IIIB disease (according to TNM 8th edition) who are eligible for primary surgery.
- \_Histopathologically confirmed NSCLC, or a strong suspicion of cancer on lung imaging necessitating surgery (e.g. diagnosis determined from frozen section in theatre)
- \_Primary surgery in keeping with NICE guidelines planned
- \_Agreement to be followed up at a TRACERx site
- \_Performance status 0 or 1
- \_Minimum tumor diameter at least 15mm to allow for sampling of at least two tumour regions (if 15mm, a high likelihood of nodal involvement on pre-operative imaging required to meet eligibility according to stage, i.e. T1N1-3)

## Exclusion Criteria:

- \_Any other\* malignancy diagnosed or relapsed at any time, which is currently being treated (including by hormonal therapy).
- \_Any other\* current malignancy or malignancy diagnosed or relapsed within the past 3 years\*\*.
- \*Exceptions are: non-melanomatous skin cancer, stage 0 melanoma in situ, and in situ cervical cancer
- \*\*An exception will be made for malignancies diagnosed or relapsed more than 2, but less than 3, years ago only if a pre-operative biopsy of the lung lesion has confirmed a diagnosis of NSCLC.
- \_Psychological condition that would preclude informed consent
- \_Treatment with neo-adjuvant therapy for current lung malignancy deemed necessary
- \_Post-surgery stage IV
- \_Known Human Immunodeficiency Virus (HIV), Hepatitis B Virus (HBV), Hepatitis C Virus (HCV) or syphilis infection.
- \_Sufficient tissue, i.e. a minimum of two tumor regions, is unlikely to be obtained for the study based on pre-operative imaging

## Patient ineligibility following registration

- \_There is insufficient tissue
- \_The patient is unable to comply with protocol requirements
- \_There is a change in histology from NSCLC following surgery, or NSCLC is not confirmed during or after surgery.
- \_Change in staging to IIIC or IV following surgery
- \_The operative criteria are not met (e.g. incomplete resection with macroscopic residual tumors (R2)). Patients with microscopic residual tumors (R1) are eligible and should remain in the study
- \_Adjuvant therapy other than platinum-based chemotherapy and/or radiotherapy is administered.

## Recruitment

When patients are initially diagnosed with stage I-III lung cancer and then referred for surgical resection, a research nurse identifies them on a clinic/operating list. The patient has an initial eligibility assessment and then provided with written information about the TRACERx study and he/she can ask the research nurse any questions.

Patients have to agree to provide serial blood samples whenever they attend clinic for routine blood sampling, so this represents the only main potential self-selecting bias (i.e. only patients willing to do this would participate). However, it is unclear how this would affect the biomarker analyses. Also, the gender and ethnicity characteristics are in line with patients seen in routine practice.

Inclusion and exclusion criteria are summarised above.

## Ethics oversight

The study was approved by the NRES Committee London with the following details:

Study title: TRACing non small cell lung Cancer Evolution through therapy (Rx)  
 REC reference: 13/LO/1546  
 Protocol number: UCL/12/0279  
 IRAS project ID: 138871

Note that full information on the approval of the study protocol must also be provided in the manuscript.

## Clinical data

Policy information about [clinical studies](#)

All manuscripts should comply with the ICMJE [guidelines for publication of clinical research](#) and a completed [CONSORT checklist](#) must be included with all submissions.

## Clinical trial registration

TRACERx Lung <https://clinicaltrials.gov/ct2/show/NCT01888601>, approved by an independent Research Ethics Committee, 13/LO/1546

## Study protocol

<https://clinicaltrials.gov/ct2/show/NCT01888601>

## Data collection

Clinical and pathological data is collected from patients during study follow up - this period is a minimum of five years. Data collection is overseen by the sponsor of the study (Cancer Research UK & UCL Cancer Trials Centre) and takes place in hospitals across the

United Kingdom. A centralised database called MACRO is used for this purpose. Recruitment started in April 2014 and is still ongoing (in London and Manchester).

## Outcomes

The main clinical outcomes are:

Disease-free survival (DFS) – measured from the time of study registration to date of first lung recurrence or death from any cause.

Patients who do not have these events are censored at the date last known to be alive (including patients who developed a new primary tumour that has been shown biologically to not be linked to the initial primary lung tumour).

Overall survival - measured from the time of study registration to date of death from any cause.

In this paper, lung cancer specific survival metrics were also used to assess risk of disease recurrence.
